# Supplementary material
Source: publisher site journal article supplement (https://www.dovepress.com/article/287398)
Supplement: Supplementary file 1 [file get_supplementary_file.php]

**Supplementary material**

**Questionnaires of English version**

**Part 1: Questions to assess the socio-demographic characteristics of respondents**

| **S.no** | **Questions** | **Response** |
| --- | --- | --- |
| Q101 | Age | __________years |
| Q102 | Sex | 1. Male 2. Female |
| Q103 | What is your ethnicity? | 1. Amhara  2. Tigre  3. Oromo  4.Afar  5.Other(Specify)___________ |
| Q104 | What is your religion? | 1. Orthodox 2. Muslim 3. Protestant 4. Catholic 5. Other(specify) |
| Q105 | Where is your original residence? | 1. Town 2. Rural |
| Q106 | What is your department /field of study? | 1. Nursing 2. Public Health Officer 3. Medical Laboratory 4. Midwifery |
| Q107 | Student’s study year | 1. 1st year 2. 2nd year 3. 3rd year 4. 4th year |

**Part 2. Questions to assess blood donation practice of respondents and related factors**

| s.no | Questions | Response |
| --- | --- | --- |
| Q201 | Have you ever being transfused with blood? | 1.Yes  2.No |
| Q202 | Is there history of blood transfusion in your family? | 1.Yes  2.No |
| Q203 | Did you donate blood at least once in your life time? | 1.Yes  2.No |
| Q204 | If yes to Q 203, what type of donation was? | 1. Voluntary 2. Replacement 3. other |
| Q205 | If No to Q203, why didn’t donate blood? | 1. Fear of health problem after screening 2. Fear of pain 3. Fear of weight loss 4. Lack of information 5. Others( specify)….. |
| Q206 | Do you have willingness to donate blood in the future? | 1. Yes 2. No |

**Part 3. Questions to assess the knowledge of students about blood donation**

| S.no | Questions | Responses |
| --- | --- | --- |
| Q301 | Had you heard about blood donation before the study? | 1.Yes  2. No |
| Q302 | Do you know the most common blood group types? | 1.Yes  2. No |
| Q303 | Do you know your own blood group type? | 1.Yes  2. No |
| Q304 | At what interval are blood donors able to donate? | 1.Yes  2. No |
| Q305 | During blood donation, how much blood should be donated by a donor? | 1. 250 mL–500 mL  2. <250 mL,  3. >500 mL  4. I don’t know |
| Q308 | Do you know how much time is required for the blood donation process? | 1. <20 minutes 2. >20 minutes 3. I have no idea |
| Q309 | Do you know places of blood donation? | 1.Yes  2. No |
| Q310 | Do you know the Importance of blood donation? | 1.Yes  2. No |
| **Part 4. Questions to assess the attitude of students about blood donation** | | |
| Q401 | What do you think about voluntary blood donation? | 1. Good 2. Not good 3. Not good not bad 4. I do not know |
| Q402 | Among different blood donation types which one do you think is the best? | 1. Voluntary 2. Replacement 3. Paid/professional |
| Q403 | Do you think that something which can affect your health could happen after blood donation? | 1. Yes 2. Will not happen 3. Not sure |
| Q404 | Do you think family blood donation is best for the recipient of the same family? | 1. Yes 2. No 3. Not sure |
